# Supplementary material
Source: PubMed Central journal article supplement (PMC2602865)
Supplement: M800411-JLR200_1.pdf [file M800411-JLR200_1.pdf]

**Supplemental Table 1.** Primers for identifying the 129 region in each backcrossing generation

| Marker    | Location |      | Forward primer (5'-3') | Reverse primer (5'-3') |
|-----------|----------|------|------------------------|------------------------|
|           |          | (Mb) |                        |                        |
| D1Mit386  | 102.3    |      | CTCTTTTGTCTCTCTTTGTC   | TGCCTTGAAGGCACAATGTA   |
| D1Mit495  | 129.5    |      | CCACCTTGCTCCAAAAGAAA   | TCTGAGAGGCTGCCACAATA   |
| rs4222719 | 158.3    |      | TCTGTGCCCTATCATTCCCTA  | GCCAACAACAAAATGGAGT    |
| rs3711833 | 158.6    |      | CTAACCTGGGAGCACACAAA   | CTGTGGAGAGATGCCAAATG   |
| D1Mit159  | 161.6    |      | TCTGGGGCCACTATGAGATC   | CACAATCAGAAAATATTATGA  |
| D1Mit111  | 170.9    |      | TTGCCTGACTCCAGTATTCTA  | TTAGGTGTGTGAAAGACATTC  |
| D1Mit206  | 174.9    |      | TGAGGCACCTTTGTATTCAGC  | CCAGATGTCTTTGAACATTCTC |
| D1Mit406  | 190.1    |      | GAACTTGGAAACAAATATGA   | TGCAAGAGAGTAAGTTTTACT  |
| D1Mit291  | 186.6    |      | TGCCCGTGATAACCCTATGT   | TTGTGCACAAGCAGGAGC     |

**Supplemental Table 2.** QTL positional candidate genes

| Mb                            | Gene                 | Mb     | Gene                  | Mb     | Gene                 | Mb     | Gene                 |
|-------------------------------|----------------------|--------|-----------------------|--------|----------------------|--------|----------------------|
| <b><u>Hdlq21 on Chr.3</u></b> |                      |        |                       |        |                      |        |                      |
| 127.68                        | <i>Alpk1</i>         | 127.80 | <i>BC002199</i>       | 127.81 | <i>NP_666076.2</i>   | 127.86 | <i>5730508B09Rik</i> |
| 127.78                        | <i>T2bp</i>          |        |                       |        |                      |        |                      |
| <b><u>Hdlq52 on Chr5</u></b>  |                      |        |                       |        |                      |        |                      |
| 8.05                          | <i>Sri</i>           | 11.06  | <i>XR_002301.1</i>    | 12.39  | <i>Sema3d</i>        | 21.32  | <i>Slc26a5</i>       |
| 8.08                          | <i>Adam22</i>        | 11.19  | <i>Speer1-ps1</i>     | 13.40  | <i>Sema3a</i>        | 21.40  | <i>Reln</i>          |
| 8.89                          | <i>Abcb4</i>         | 11.43  | <i>EG623898</i>       | 14.03  | <i>Sema3e</i>        | 22.00  | <i>Orc5l</i>         |
| 9.27                          | <i>9330182L06Rik</i> | 11.60  | <i>NP_001033008.1</i> | 14.52  | <i>Pclo</i>          | 22.26  | <i>Lhfpl3</i>        |
| 9.49                          | <i>Grm3</i>          | 11.61  | <i>XR_002301.1</i>    | 15.45  | <i>Cacna2d1</i>      | 22.95  | <i>Mll5</i>          |
| 10.87                         | <i>EG623898</i>      | 11.93  | <i>EG623898</i>       | 21.00  | <i>Fbxl13</i>        | 23.02  | <i>Srpk2</i>         |
| <b><u>Hdlq44 on Chr.8</u></b> |                      |        |                       |        |                      |        |                      |
| 71.21                         | <i>Sh2d4a</i>        | 83.60  | <i>Smarca5</i>        | 84.61  | <i>Inpp4b</i>        | 86.18  | <i>Ucp1</i>          |
| 71.29                         | <i>4732435N03Rik</i> | 83.66  | <i>Gab1</i>           | 85.23  | <i>Il15</i>          | 86.20  | <i>Elmod2</i>        |
| 71.72                         | <i>Ints10</i>        | 83.88  | <i>Usp38</i>          | 85.65  | <i>Zfp330</i>        | 86.24  | <i>4933434I20Rik</i> |
| 71.81                         | <i>Lpl</i>           | 83.91  | <i>NP_776143.1</i>    | 85.75  | <i>Rnf150</i>        | 86.28  | <i>Clgn</i>          |
| 71.97                         | <i>Slc18a1</i>       | 84.20  | <i>XR_003287.1</i>    | 86.06  | <i>Tbc1d9</i>        | 86.32  | <i>Scoc</i>          |
| <b><u>Hdlq56 on Chr17</u></b> |                      |        |                       |        |                      |        |                      |
| 52.94                         | <i>Rab5a</i>         | 53.14  | <i>Sgoll</i>          | 53.29  | <i>Sult1c2</i>       | 53.75  | <i>Slc5a7</i>        |
| 53.03                         | <i>Pcaf</i>          | 53.19  | <i>4932415M13Rik</i>  | 53.43  | <i>Sult1c1</i>       |        |                      |
| <b><u>Hdlq57 on Chr18</u></b> |                      |        |                       |        |                      |        |                      |
| 12.12                         | <i>6030446N20Rik</i> | 12.27  | <i>Riok3</i>          | 12.31  | <i>3110002H16Rik</i> |        |                      |

**Supplemental Table 3.** SNPs for screening knockout mice made by stain 129 backcrossing into B6

| QTL           | Chr | Start SNP  |                          | End SNP    |                          |
|---------------|-----|------------|--------------------------|------------|--------------------------|
|               |     | SNP ID     | Position Mb <sup>a</sup> | SNP ID     | Position Mb <sup>a</sup> |
| <i>Hdlq15</i> | 1   | rs3714825  | 170.0                    | rs3699295  | 175.8                    |
| <i>Hdlq21</i> | 3   | rs3708141  | 116.9                    | rs3089257  | 130.7                    |
| <i>Hdlq52</i> | 5   | rs31363472 | 7.0                      | rs6226708  | 33.7                     |
| <i>Hdlq1</i>  | 5   | rs3678094  | 79.6                     | rs3705399  | 127.1                    |
| <i>Hdlq53</i> | 6   | rs4225658  | 5.4                      | rs13478673 | 26.9                     |
| <i>Hdlq44</i> | 8   | rs3089230  | 71.0                     | rs3706660  | 90.1                     |
| <i>Hdlq16</i> | 8   | rs3708282  | 94.1                     | rs6296597  | 122.5                    |
| <i>Hdlq17</i> | 9   | rs3704408  | 26.7                     | rs3653389  | 43.5                     |
| <i>Hdlq54</i> | 9   | rs3682798  | 60.2                     | rs3711701  | 97.2                     |
|               | 11  | rs3712384  | 110.2                    | rs3023710  | 117.7                    |
|               | 13  | rs3695486  | 4.1                      | rs3090002  | 53.2                     |
| <i>Hdlq55</i> | 14  | rs47145951 | 94.4                     | rs3665847  | 117.5                    |
| <i>Hdlq56</i> | 17  | rs13482973 | 37.7                     | rs4231722  | 86.7                     |
| <i>Hdlq57</i> | 18  | rs3718907  | 10.0                     | rs3693151  | 37.8                     |
| <i>Hdlq47</i> | 18  | rs3693151  | 37.8                     | rs3023468  | 63.6                     |

<sup>a</sup> Mb is based on NCBI 36.
